# Supplementary material for: Novel Antioxidants and α-Glycosidase and Protein Tyrosine Phosphatase 1B Inhibitors from an Endophytic Fungus Penicillium brefeldianum F4a
Source: MDPI journal article supplement (doi:10.3390/jof7110913), 2021-10-27

# Supporting Information

## **Novel antidiabetic and antioxidant secondary metabolites from plant-associated endophytic fungus *Penicillium brefeldianum* F4a**

Yan Bai<sup>1</sup>, Ping Yi<sup>2</sup>, Songya Zhang<sup>3</sup>, Jiangchun Hu<sup>1</sup>, and Huaqi Pan<sup>\*, 1</sup>

<sup>1</sup>Institute of Applied Ecology, Chinese Academy of Sciences, Shenyang 110016, People's Republic of China

<sup>2</sup>The Key Laboratory of Chemistry for Natural Product of Guizhou Province and Chinese Academy of Sciences, Guiyang 550002, People's Republic of China

<sup>3</sup>CAS Key Laboratory of Quantitative Engineering Biology, Shenzhen Institute of Synthetic Biology, Shenzhen Institute of Advanced Technology, Chinese Academy of Sciences, Shenzhen 518055, People's Republic of China

Address correspondence to: Huaqi Pan

E-mail: panhq@iae.ac.cn;

Tel: 86-24-83970386

Fax:86-24-83970300

## List of Supporting Information

**Figure S1.** HRESIMS spectrum of compound **1**.

**Figure S2.** IR spectrum of compound **1**.

**Figure S3.**  $^1\text{H}$  NMR (600 MHz,  $\text{DMSO-}d_6$ ) spectrum of compound **1**.

**Figure S4.**  $^{13}\text{C}$  NMR (150 MHz,  $\text{DMSO-}d_6$ ) spectrum of compound **1**.

**Figure S5.** HSQC spectrum of compound **1**.

**Figure S6.**  $^1\text{H-}^{13}\text{C}$  HMBC spectrum of compound **1**.

**Figure S7.**  $^1\text{H-}^1\text{H}$  COSY spectrum of compound **1**.

**Figure S8.** HRESIMS spectrum of compound **2**.

**Figure S9.** IR spectrum of compound **2**.

**Figure S10.**  $^1\text{H}$  NMR (600 MHz,  $\text{DMSO-}d_6$ ) spectrum of compound **2**.

**Figure S11.**  $^{13}\text{C}$  NMR (150 MHz,  $\text{DMSO-}d_6$ ) spectrum of compound **2**.

**Figure S12.** HSQC spectrum of compound **2**.

**Figure S13.**  $^1\text{H-}^{13}\text{C}$  HMBC spectrum of compound **2**.

**Figure S14.** HRESIMS spectrum of compound **3**.

**Figure S15.** IR spectrum of compound **3**.

**Figure S16.**  $^1\text{H}$  NMR (600 MHz,  $\text{DMSO-}d_6$ ) spectrum of compound **3**.

**Figure S17.**  $^{13}\text{C}$  NMR (150 MHz,  $\text{DMSO-}d_6$ ) spectrum of compound **3**.

**Figure S18.** HSQC spectrum of compound **3**.

**Figure S19.**  $^1\text{H-}^{13}\text{C}$  HMBC spectrum of compound **3**.

**Figure S20.**  $^1\text{H-}^1\text{H}$  COSY spectrum of compound **3**.

**Figure S1.** HRESIMS spectrum of compound **1**

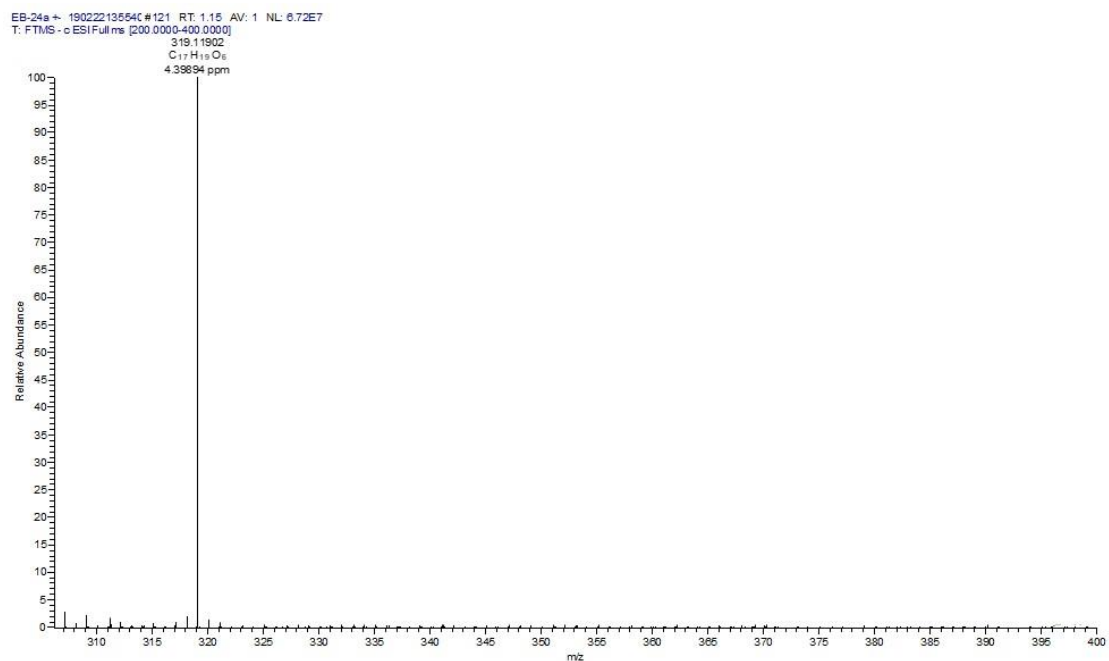

**Figure S2.** IR spectrum of compound **1**

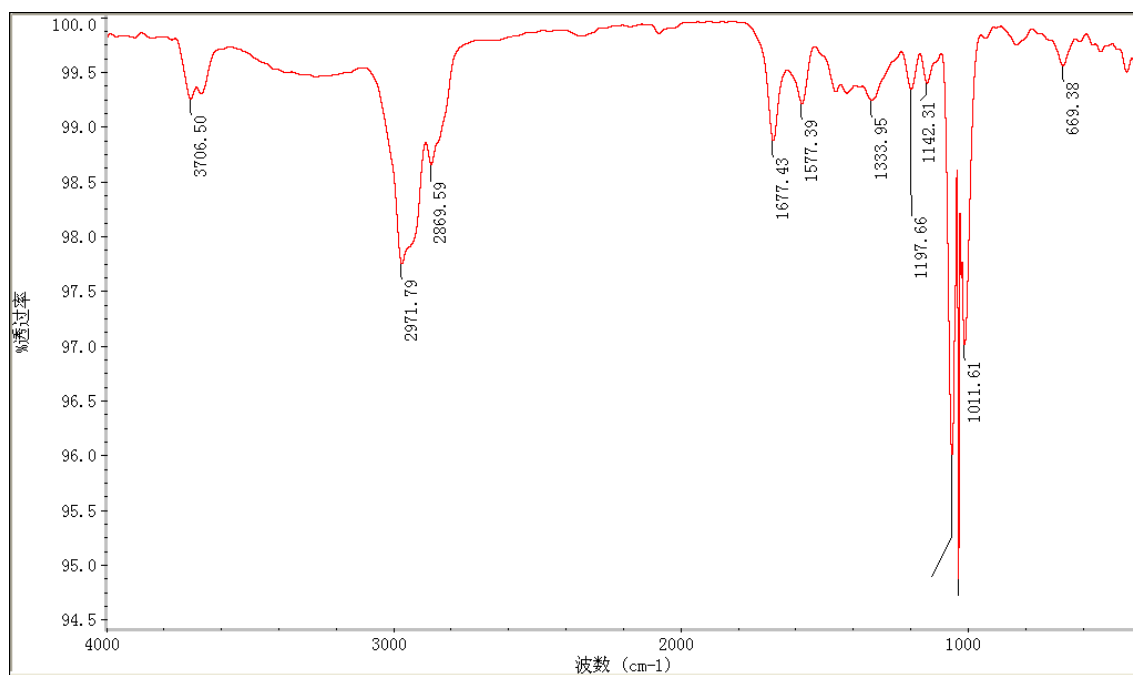

**Figure S3.**  $^1\text{H}$  NMR (600 MHz,  $\text{DMSO-}d_6$ ) spectrum of compound **1**

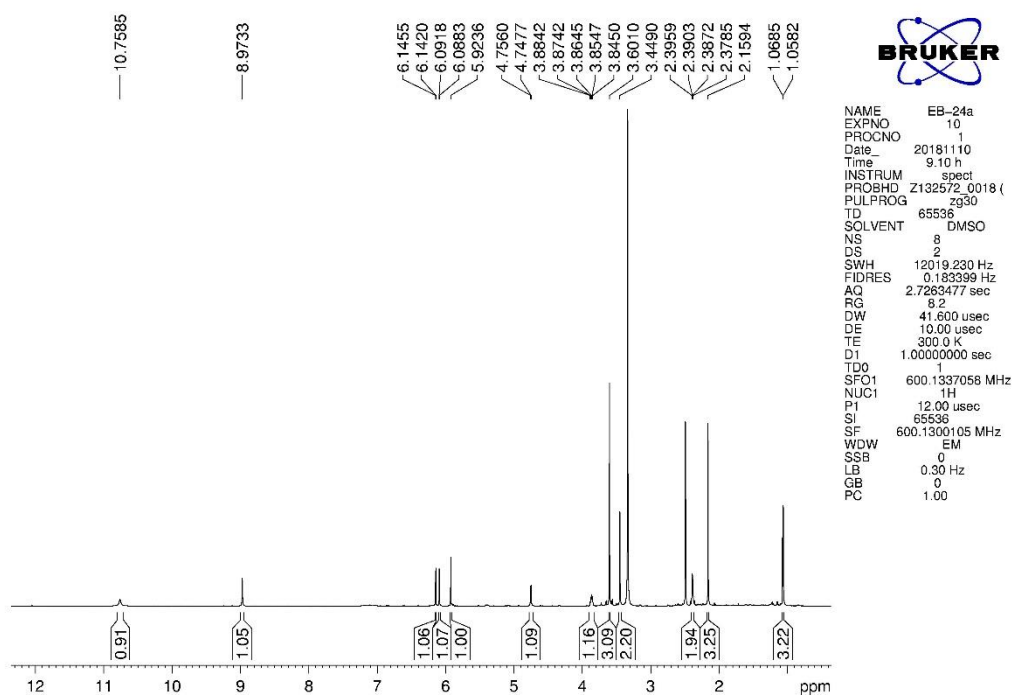

**Figure S4.**  $^{13}\text{C}$  NMR (150 MHz,  $\text{DMSO-}d_6$ ) spectrum of compound **1**

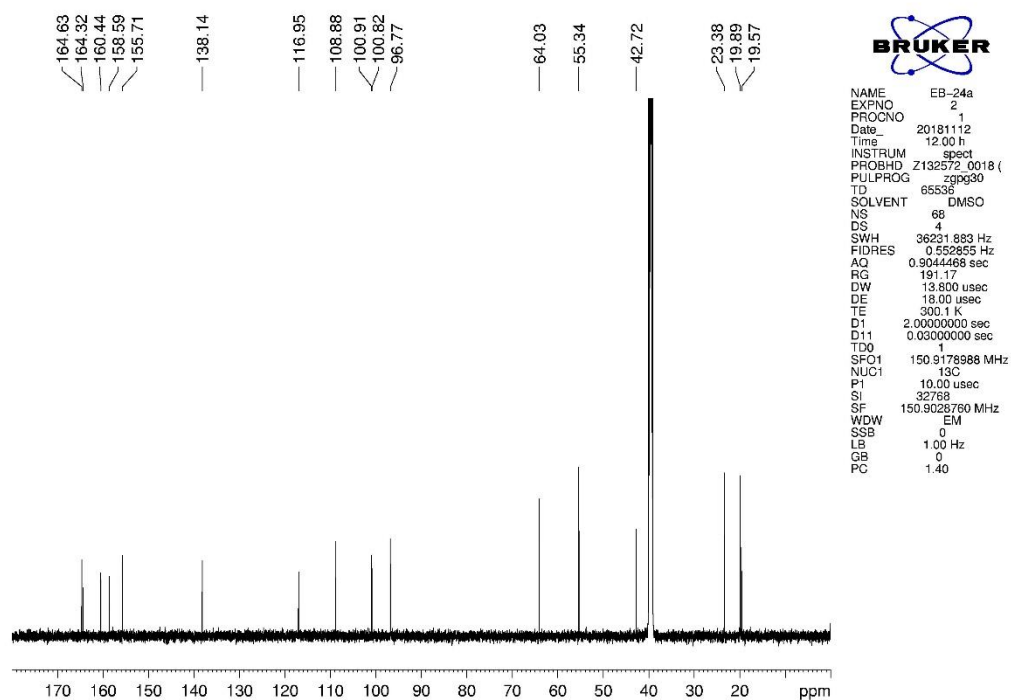

**Figure S5. HSQC spectrum of compound 1**

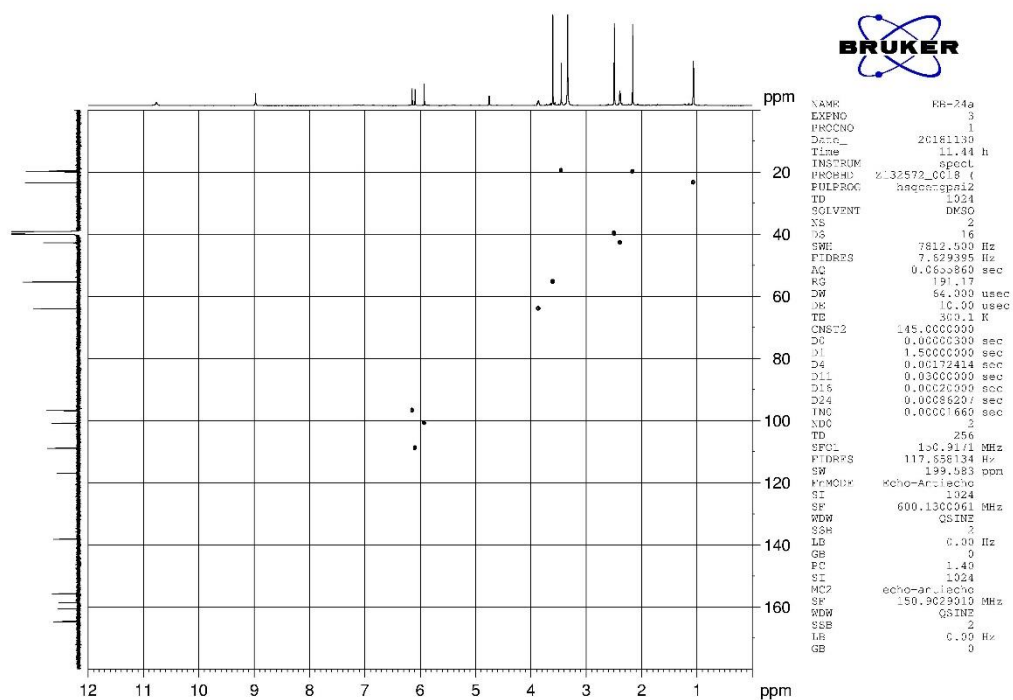

**Figure S6.  $^1\text{H}$ - $^{13}\text{C}$  HMBC spectrum of compound 1**

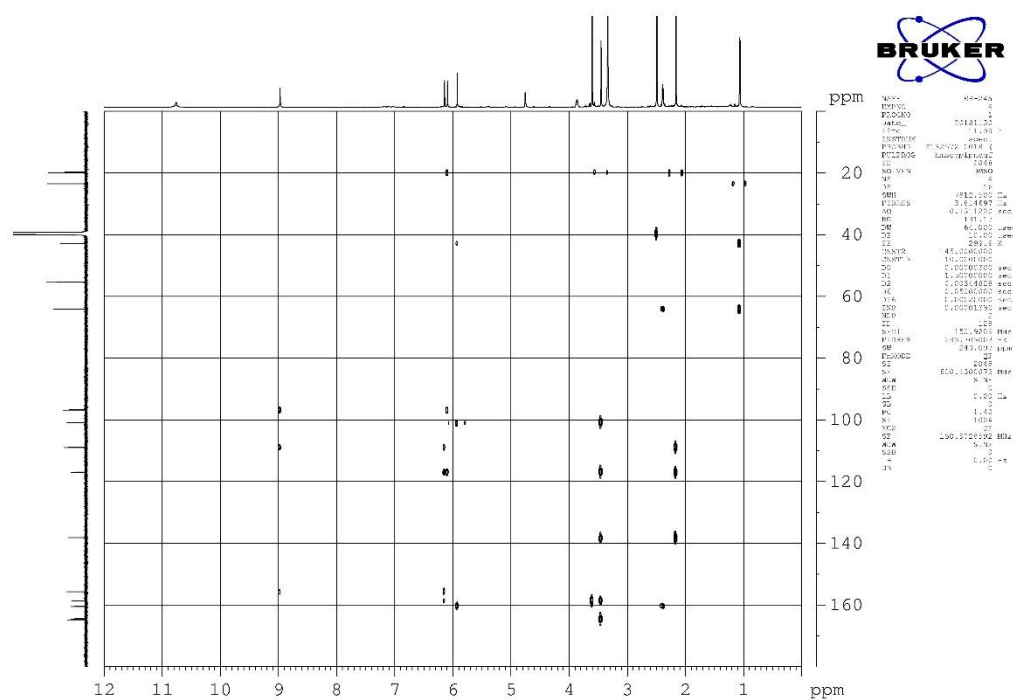

**Figure S7.**  $^1\text{H}$ - $^1\text{H}$  COSY spectrum of compound **1**

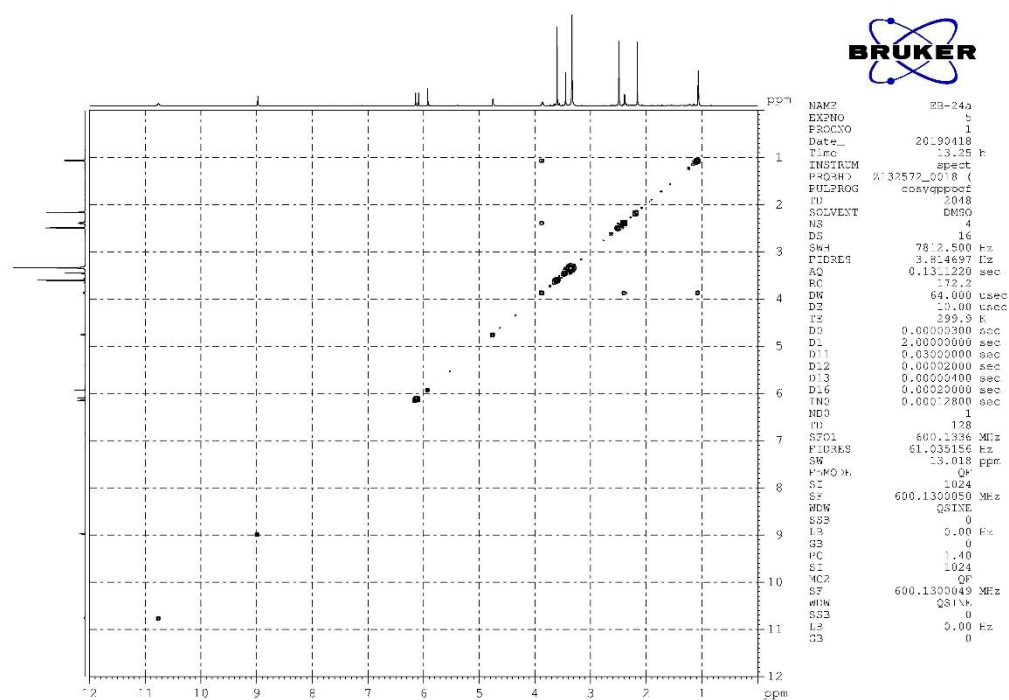

**Figure S8.** HRESIMS spectrum of compound **2**

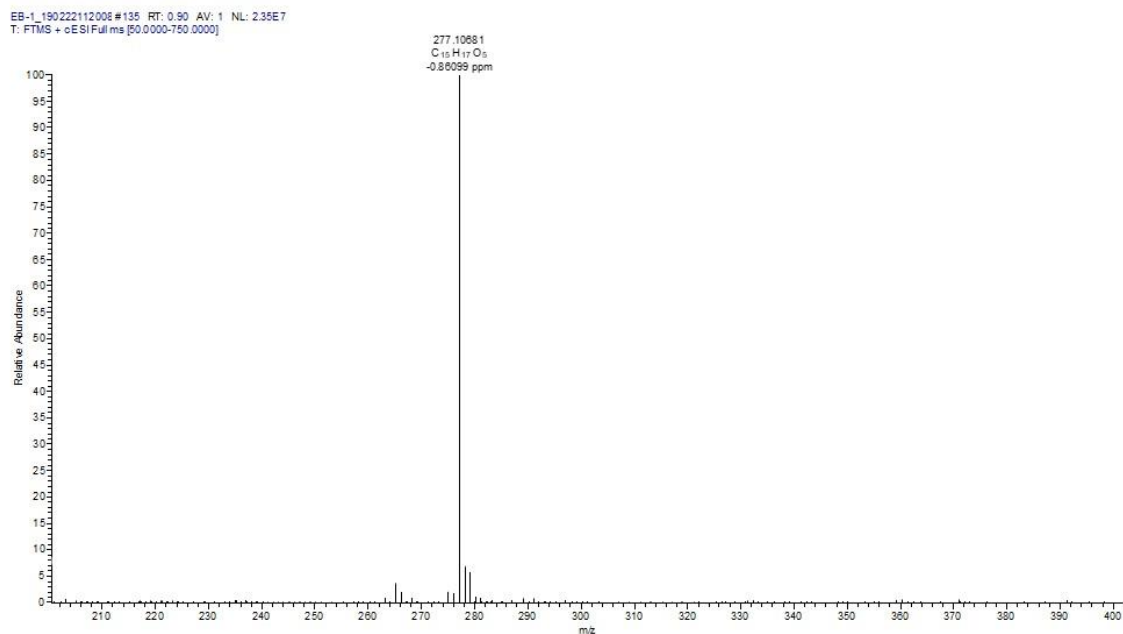

**Figure S9. IR spectrum of compound 2**

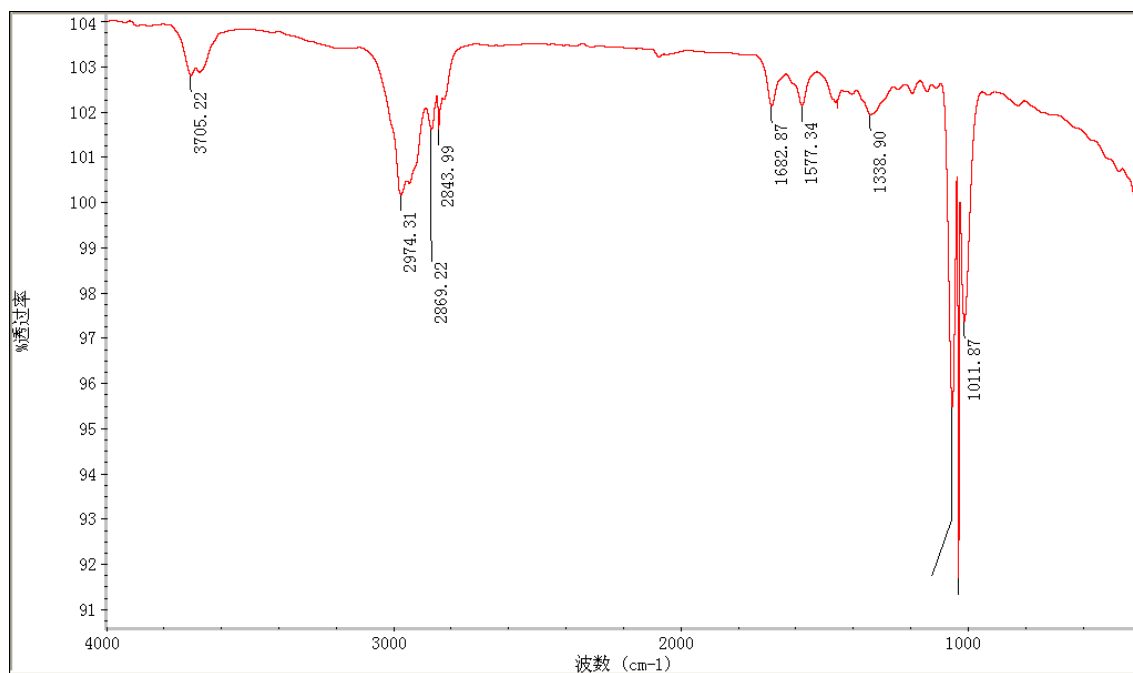

**Figure S10. <sup>1</sup>H NMR (600 MHz, DMSO-*d*<sub>6</sub>) spectrum of compound 2**

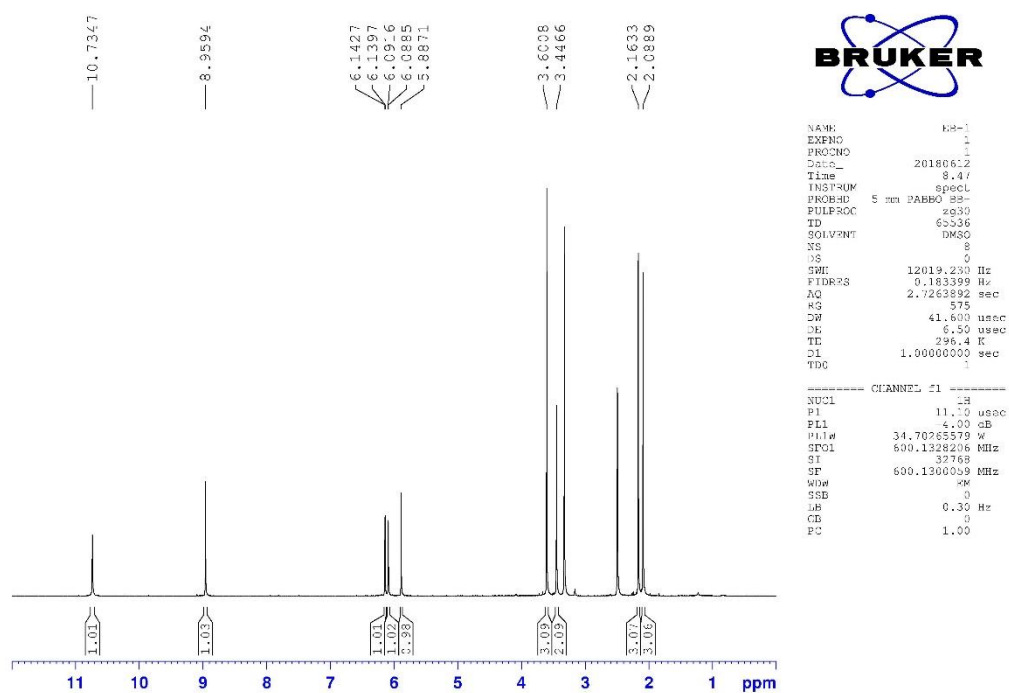

**Figure S11.**  $^{13}\text{C}$  NMR (150 MHz,  $\text{DMSO}-d_6$ ) spectrum of compound **2**

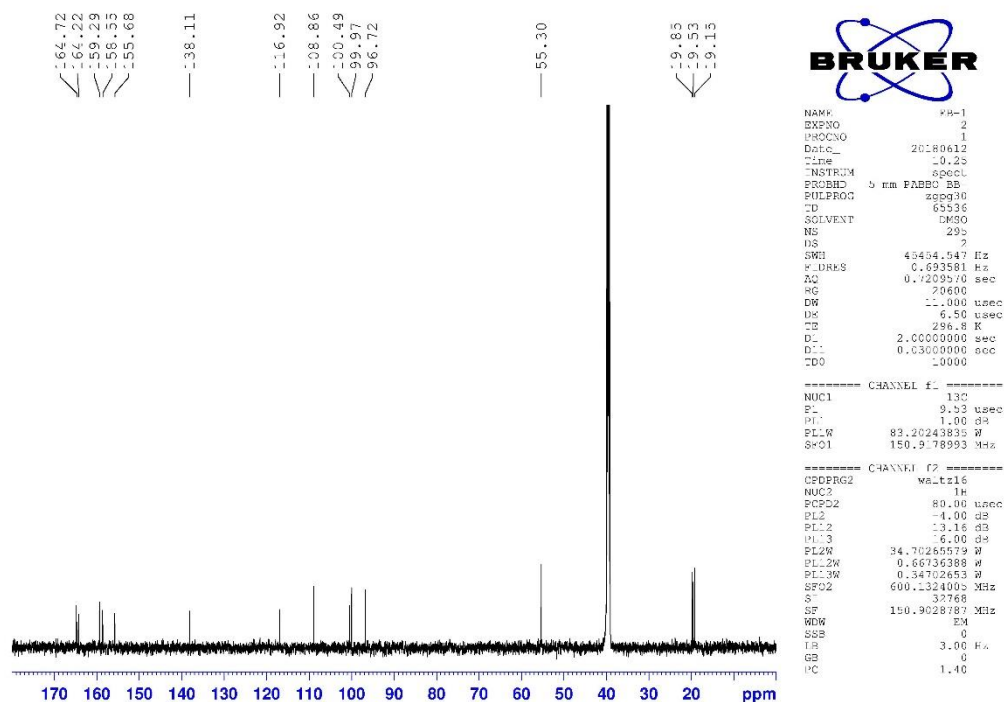

**Figure S12.** HSQC spectrum of compound **2**

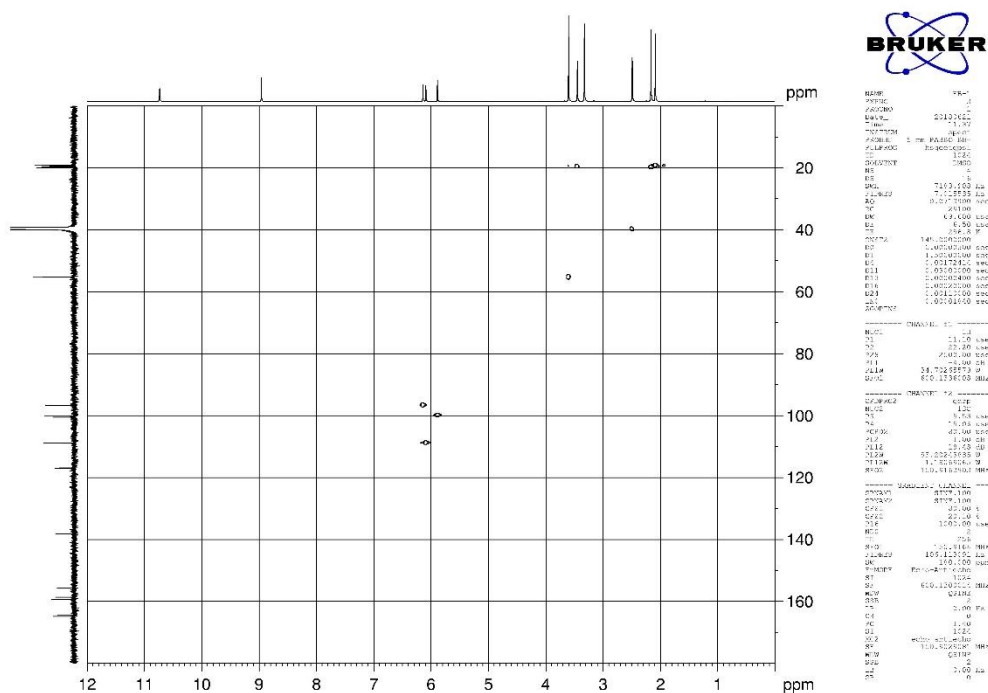



**Figure S13.**  $^1\text{H}$ - $^{13}\text{C}$  HMBC spectrum of compound **2**

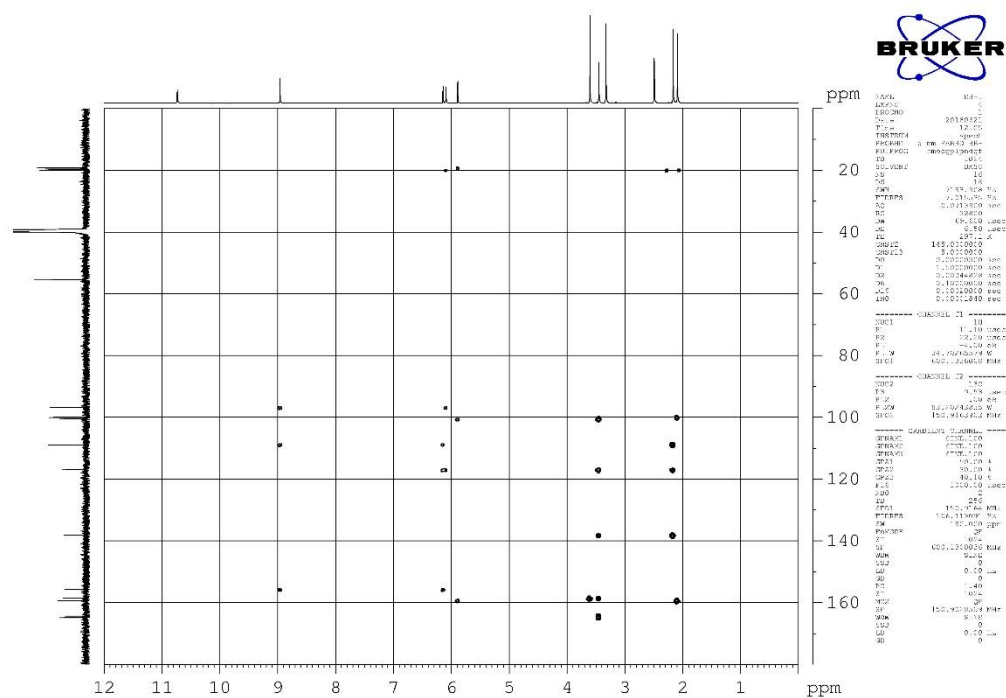

**Figure S15.** IR spectrum of compound **3**

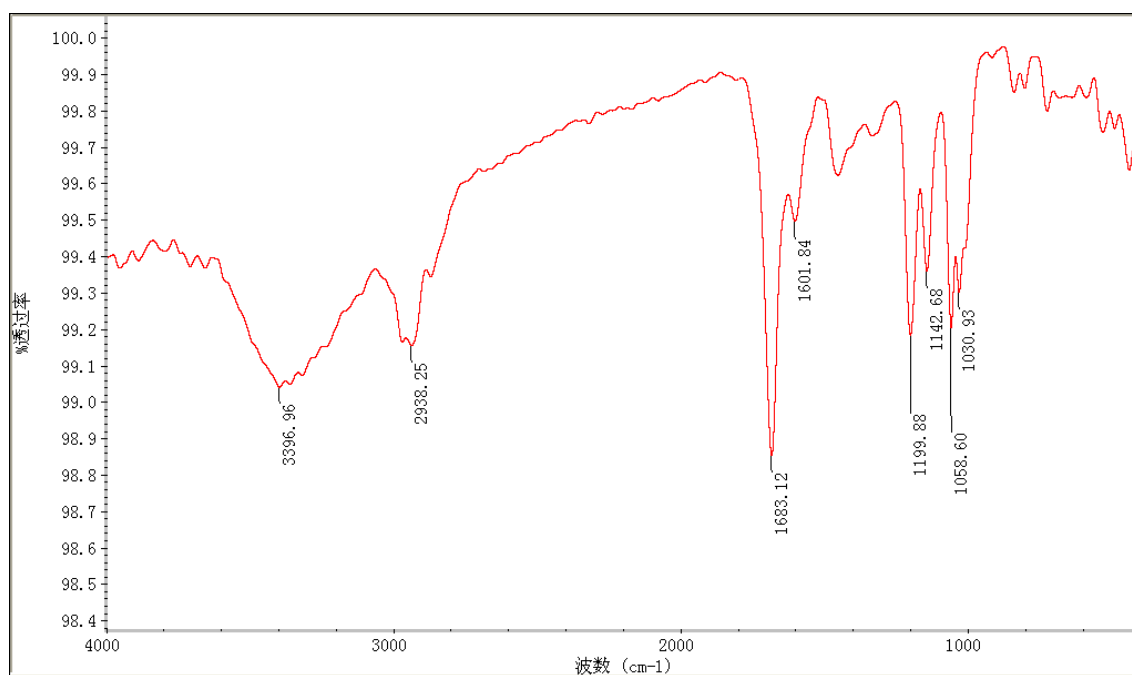

**Figure S16.** <sup>1</sup>H NMR (600 MHz, DMSO-*d*<sub>6</sub>) spectrum of compound **3**

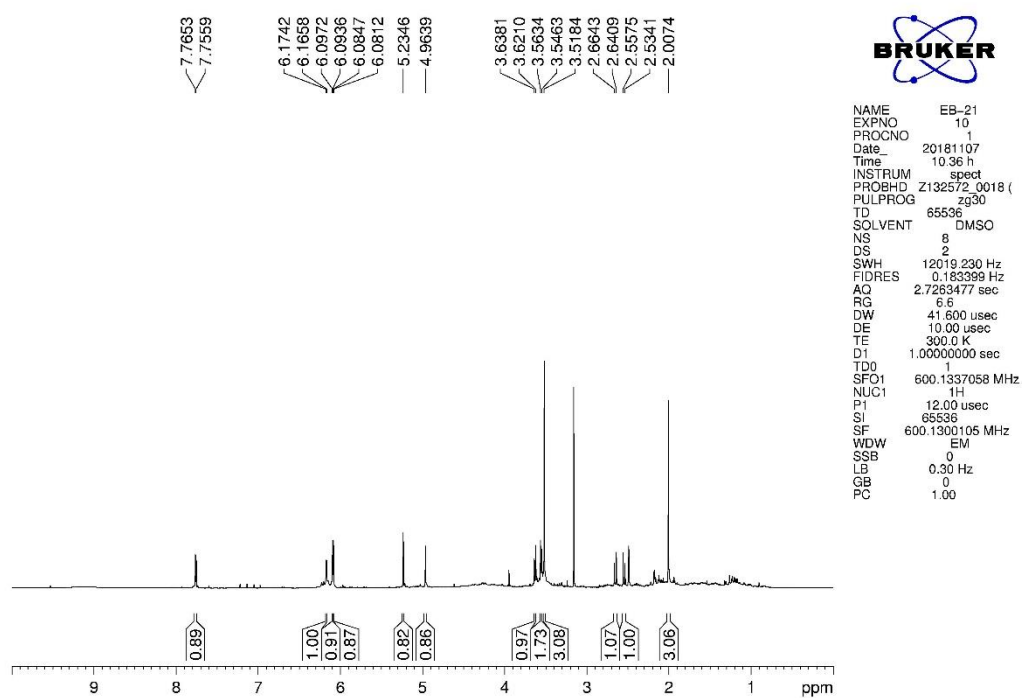

**Figure S17.**  $^{13}\text{C}$  NMR (150 MHz,  $\text{DMSO}-d_6$ ) spectrum of compound **3**

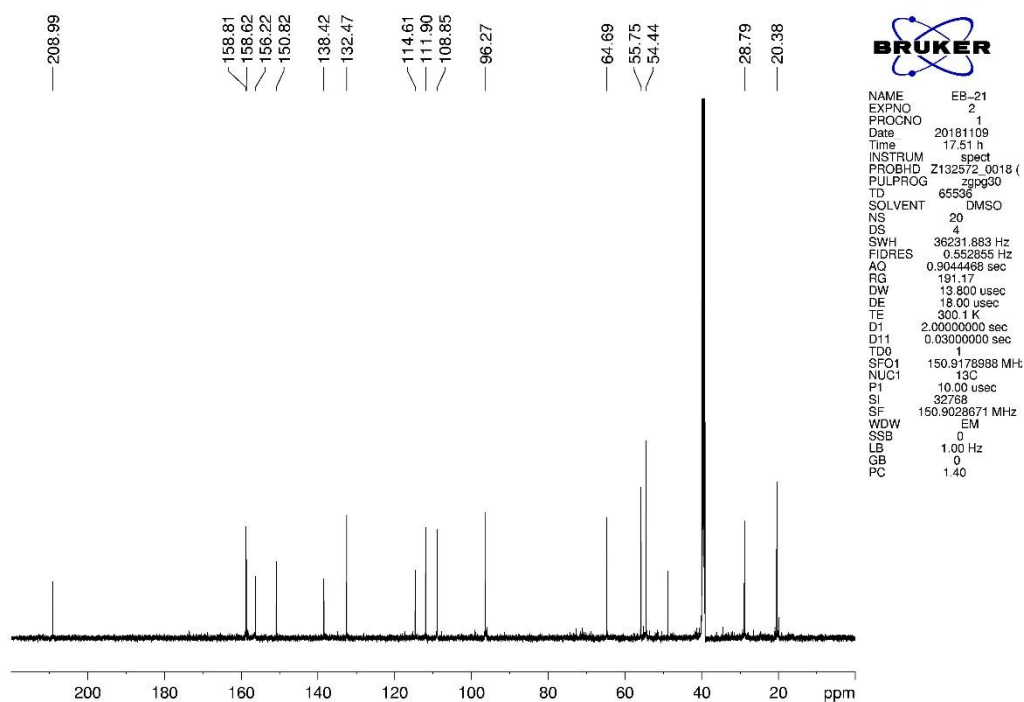

**Figure S18.** HSQC spectrum of compound **3**

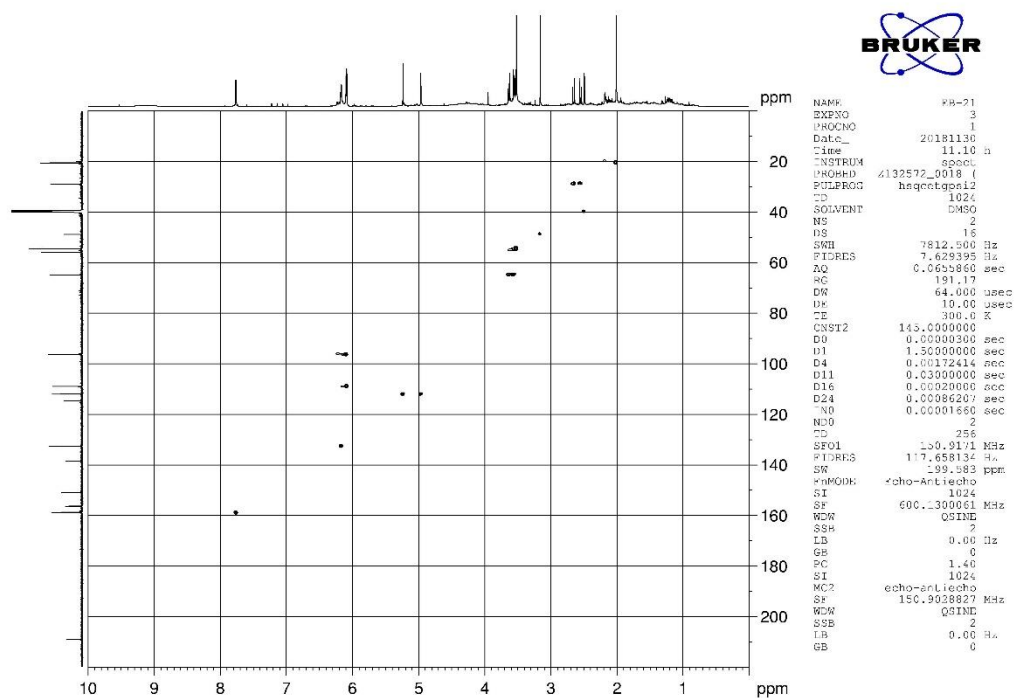

Figure S19.  $^1\text{H}$ - $^{13}\text{C}$  HMBC spectrum of compound 3

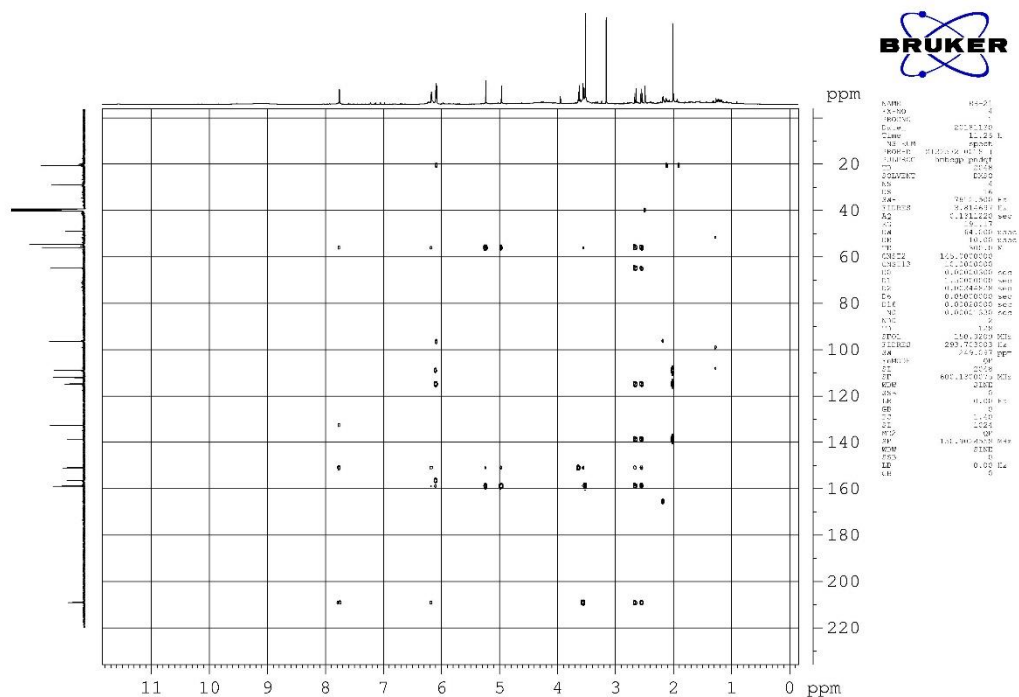

Figure S20.  $^1\text{H}$ - $^1\text{H}$  COSY spectrum of compound 3

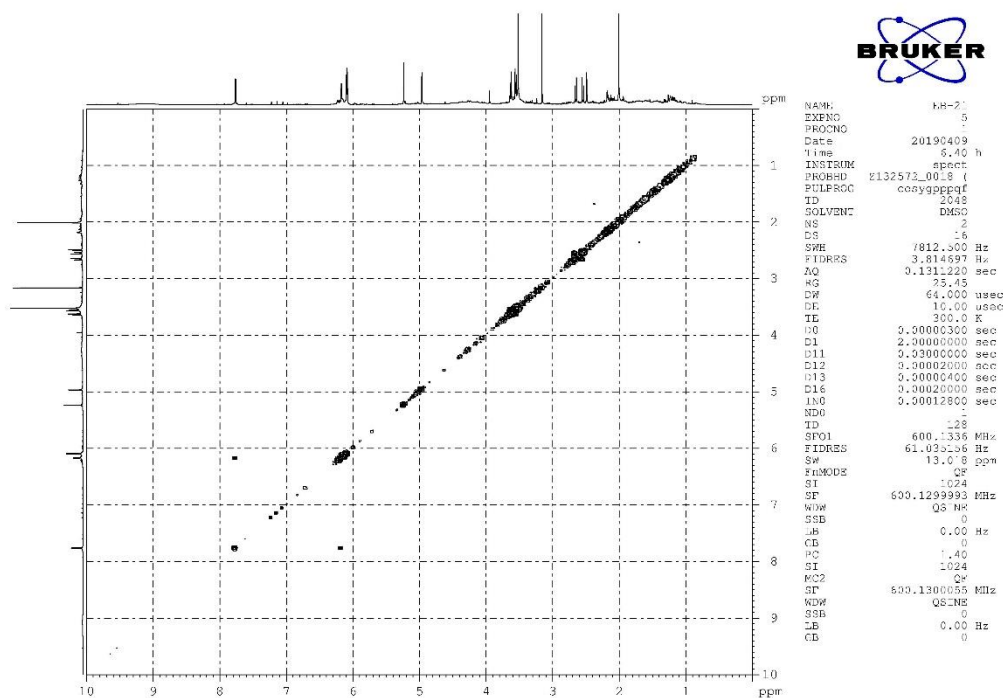

Supplement: s1 [file s1]
